# Supplementary material for: An Analysis of the Trend of Fetal Mortality Rates among Working and Jobless Households in Japan, 1995–2019
Source: MDPI journal article supplement (doi:10.3390/ijerph18094810), 2021-04-30
Supplement: s1 [file s1]

**Table S1.** The yearly artificial and spontaneous fetal mortality rates per 1000 births and GDP per capita in Japan.

| Year | GDP per capita* | Crude rate                      |                                  | Maternal age-standardized rate  |                                  |
|------|-----------------|---------------------------------|----------------------------------|---------------------------------|----------------------------------|
|      |                 | Artificial fetal mortality rate | Spontaneous fetal mortality rate | Artificial fetal mortality rate | Spontaneous fetal mortality rate |
| 1995 | 4214.0          | 16.7                            | 14.7                             | 16.7                            | 14.7                             |
| 1996 | 4312.2          | 16.3                            | 14.5                             | 16.6                            | 14.5                             |
| 1997 | 4331.1          | 17.1                            | 13.9                             | 17.2                            | 13.9                             |
| 1998 | 4257.2          | 16.9                            | 13.4                             | 16.9                            | 13.3                             |
| 1999 | 4213.4          | 16.9                            | 13.5                             | 16.9                            | 13.4                             |
| 2000 | 4264.4          | 17.1                            | 12.9                             | 16.9                            | 12.7                             |
| 2001 | 4176.3          | 16.9                            | 12.7                             | 16.6                            | 12.4                             |
| 2002 | 4138.8          | 17.2                            | 12.5                             | 16.9                            | 12.1                             |
| 2003 | 4153.7          | 16.7                            | 12.3                             | 16.7                            | 11.9                             |
| 2004 | 4176.1          | 16.3                            | 12.2                             | 16.6                            | 11.8                             |
| 2005 | 4209.9          | 15.7                            | 12.0                             | 16.3                            | 11.5                             |
| 2006 | 4228.6          | 14.6                            | 11.7                             | 15.3                            | 11.2                             |
| 2007 | 4238.2          | 13.6                            | 11.4                             | 14.4                            | 10.8                             |
| 2008 | 4062.2          | 12.9                            | 11.1                             | 13.7                            | 10.5                             |
| 2009 | 3913.9          | 12.5                            | 11.0                             | 13.4                            | 10.2                             |
| 2010 | 3973.6          | 12.3                            | 10.9                             | 13.4                            | 10.1                             |
| 2011 | 3939.7          | 12.0                            | 10.9                             | 13.1                            | 10.0                             |
| 2012 | 3943.0          | 11.7                            | 10.6                             | 13.1                            | 9.7                              |
| 2013 | 3993.7          | 11.7                            | 10.2                             | 13.1                            | 9.2                              |
| 2014 | 4075.3          | 11.5                            | 10.4                             | 12.9                            | 9.3                              |
| 2015 | 4217.1          | 10.9                            | 10.4                             | 12.5                            | 9.3                              |
| 2016 | 4254.3          | 10.4                            | 9.9                              | 11.8                            | 8.8                              |
| 2017 | 4344.5          | 10.4                            | 9.9                              | 12.2                            | 8.9                              |
| 2018 | 4360.2          | 10.6                            | 9.7                              | 12.7                            | 8.5                              |
| 2019 | 4391.7          | 11.3                            | 10.0                             | 13.7                            | 8.9                              |

\*Unit: thousand yen
